# Supplementary material for: A new genus and species of leaf-mining moth from the French Alps, Mercantouria neli gen. n., sp. n. (Lepidoptera, Gracillariidae)
Source: Zookeys. 2016 May 4;(586):145–62. doi: 10.3897/zookeys.586.8375 (PMC4857034; doi:10.3897/zookeys.586.8375)
Supplement: Supplementary material 1 — Sample information for specimens used in this study [file zookeys-586-145-s001.xls]

## Sheet: S1
						Genbank accession numbers
	Sub family	Species	Sample ID	Process ID	COI	H3	publications
GRACILLARIDAE	Gracillariinae	Acrocercops brongniardella	CLV2010	GRACI610-10	HM902830	KP871542	Gutzwiller et al 2015
		Artifodina japonica	FloG109	GRPAL932-12	KF367652	KP871564	Gutzwiller et al 2015
		Aristaea pavoniella	CLV1967	GRSLO447-11	JF848503		this study
		Aspilapteryx tringipennella	CLV2613	GRPAL740-11	KU687406		this study
		Callisto coffeella	TLMF Lep 01934	PHLAB1134-10	KM253797		Kiricheko et al 2015
		Callisto basistrigella	TLMF Lep 01800	PHLAB1000-10	HQ968271		Kiricheko et al 2016
		Caloptilia alchimiella	FloG151	GRPAL965-12	KF367663	KP871593	Gutzwiller et al 2015
		Caloptilia bimaculatella	BIOUG02738-A09	CNSLB410-12	KM545029	JN125168	Kawahara et al 2011
		Caloptilia falconipennella	CLV3810	GRACI628-10	HM902847	KP871579	Gutzwiller et al 2015
		Mercantouria neli gen.n., sp. n.	TLMF Lep 16937	LECRT027-15	KU687408		this study
		Mercantouria neli gen.n., sp. n.	TLMF Lep 16938	LECRT028-15	KU687411		this study
		Mercantouria neli gen.n., sp. n.	TLMF Lep 08375	PHLAH556-12	KU687410	KU687405	this study
		Caloptilia rufipennella	CLV1210	GRACI602-10	HM902823	KP871569	Gutzwiller et al 2015
		Caloptilia scutellariella	USNMENT00656973	MNAM752-10	JN271972		this study
		Caloptilia semifascia	FG27	GRPAL896-12	KF367682	KP871522	Gutzwiller et al 2015
		Caloptilia stigmatella	CLV1110	GRACI601-10	HM902822	KP871586	Gutzwiller et al 2015
		Calybites phasianipennella	E11phasi	GRACI554-09	HM392517		this study
		Chileoptilia yaroella	FG61	GRPAL919-12	KF367694	KP871547	Gutzwiller et al 2015
		Cupedia cupediella	Alcupedi	LNOUC1153-11	KU687407		this study
		Eteoryctis deversa	FloG105	GRPAL929-12	KF367700	KP871565	Gutzwiller et al 2015
		Eucalybites aureola	CLV21407	GRACI102-07	GU073228		this study
		Euspilapteryx auroguttella	CLV1604	GRSLO084-10	JF848231		this study
		genus 1 sp 2	FG62	GRPAL920-12	KF367704	KP871570	Gutzwiller et al 2015
		genus 2 sp 1	FloG111	GRPAL934-12	KF367641	KP871535	Gutzwiller et al 2015
		Gracillaria syringella	FG28	GRPAL897-12	KF367671	KP871620	Gutzwiller et al 2015
		Parornix anglicella	CLV3210	GRACI622-10	HM902841	KP871573	Gutzwiller et al 2015
		Parornix betulae	CLV3110	GRACI621-10	HM902840	KP871608	Gutzwiller et al 2015
		Phodoryctis stephaniae	FloG108	GRPAL931-12	KF367705	KP871571	Gutzwiller et al 2015
		Povolnya leucapennella	G04leuc	GRACI444-09	KU687409		this study
		Spulerina dissotoma	FloG107	GRPAL930-12	KF367660	KP871583	Gutzwiller et al 2015
		Spulerina parthenocissi	FloG104	GRPAL928-12	KF367668	KP871611	Gutzwiller et al 2015
	Parectopinae	Parectopa robiniella	FG58	GRPAL917-12	KF367667	KP856956	Gutzwiller et al 2015
		Micrurapteryx gradatella	NK436	MICRU008-15	KP845411	KP856952	Kirichenko et al in press
		Micrurapteryx caraganella	NK414	ISSIK363-14	KP845397	KP856946	Kirichenko et al in press
	Lithocolletinae	Cameraria n. sp.1	FG32	GRPAL900-12	KF367640	KP871531	Gutzwiller et al 2015
		Cameraria ohridella	FG39	GRPAL906-12	KF367687	KP871534	Gutzwiller et al 2015
		Cameraria gaultheriella	10BBCLP-2216	BBLPD218-10	KM552177	JN125166	Kawahara et al 2011
		Macrosaccus robiniella	FG31	GRPAL899-12	KF367644	KP871544	Gutzwiller et al 2015
		Phyllonorycter emberizaepennella	FloG122	GRPAL938-12	KF367649	KP871559	Gutzwiller et al 2015
		Phyllonorycter tristrigella	CLV1510	GRACI605-10	HM902826	KP871597	Gutzwiller et al 2015
	Oecophyllembiinae	Eumetriochroa hederae	FloG110	GRPAL933-12	KF367707	KP871575	Gutzwiller et al 2015
	Marmarinae	Marmara serotinella	BIOUG08677-F01	CNROG997-13	CNROG997-13	JN125182	Kawahara et al 2011
	Phyllocnistinae	Phyllocnistis ramulicola	CLV1310	GRACI603-10	HM902824	KP871532	Gutzwiller et al 2015
Outgroup	Choreutidae	Anthophila fabriciana	FG10	GRPAL889-12	KF367698	KP871556	Gutzwiller et al 2015
